## Correction: A New *Bacillus anthracis* Found in Wild Chimpanzees and a Gorilla from West and Central Africa

Fabian H. Leendertz, Saniye Yumlu, Georg Pauli, Christophe Boesch, Emmanuel Couacy-Hymann, Linda Vigilant, Sandra Junglen, Svenja Schenk, Heinz Ellerbrok

DOI: 10.1371/journal.ppat.0020008

In *PLoS Pathogens*, vol 2, issue 1:

The data upon which Figures 1 and 2 are based had not been deposited in a publicly available repository at the time of publication. Readers can now access the data at Genbank (<http://www.ncbi.nlm.nih.gov/entrez/query.fcgi?db=Nucleotide>). The accession numbers are DQ497165–DQ497182.

This correction note may be found online at DOI: 10.1371/journal.ppat.0020064.

Published June 30, 2006

Citation: (2006) Correction: A New *Bacillus anthracis* Found in Wild Chimpanzees and a Gorilla from West and Central Africa. *PLoS Pathog* 2(6): e64.
